# Supplementary material
Source: publisher figshare collection journal article supplement (https://acs.figshare.com/ndownloader/files/7622209)
Supplement: Supplementary file 1 [file 7622209]

# The Influence of Interfacial Effects of the Electronic Properties of Rhodamine 6G on PVDF

Matthew Mullen and William B. Euler\*

Department of Chemistry

140 Flagg Road

Kingston, RI 02881

## Supporting Information

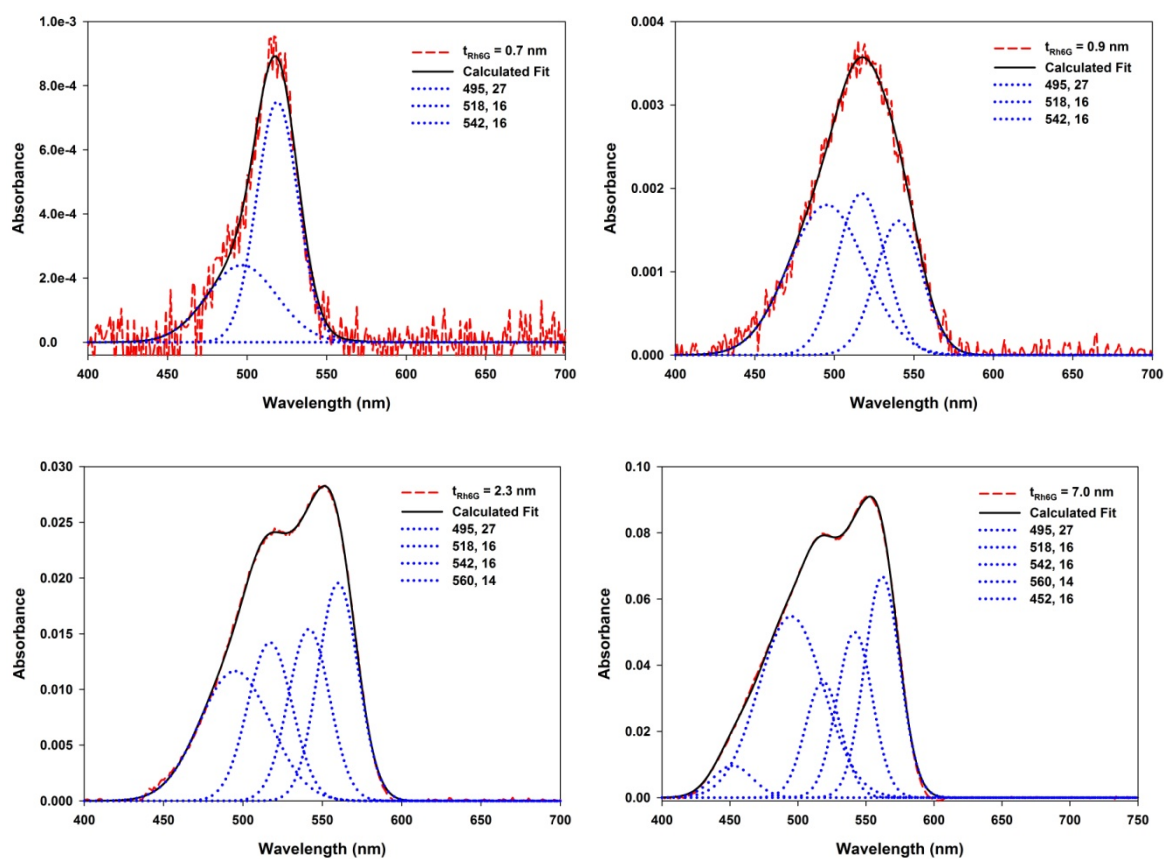

**Figure S1.** Fit lines constructed from the deconvolution of the absorbance spectra as a function of  $t_{\text{Rh6G}}$ .  $t_{\text{PVDF}} = 760$  nm. Legend shows peak position and full-width-at-half-maximum in nm.

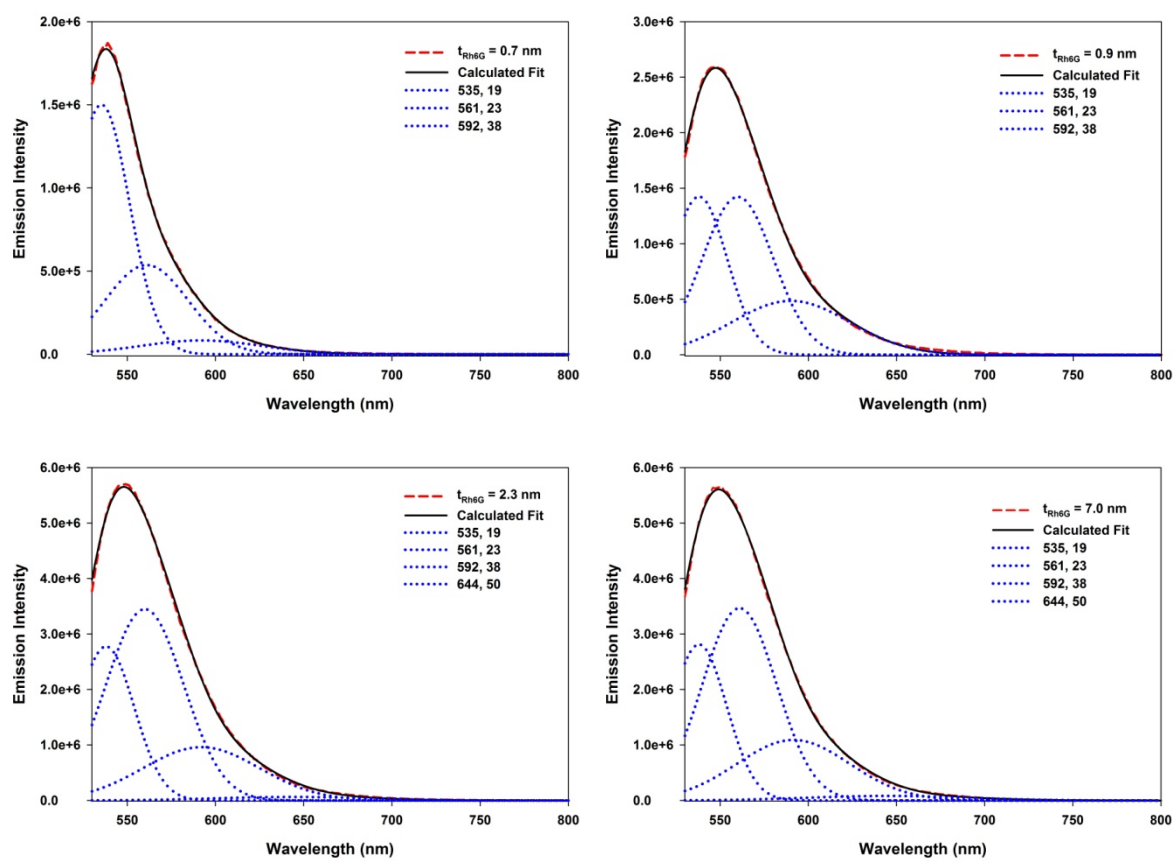

**Figure S2.** Fit lines constructed from the deconvolution of the emission spectra as a function of  $t_{\text{Rh6G}}$ .  $t_{\text{PVDF}} = 760$  nm. Legend shows peak position and full-width-at-half-maximum in nm.

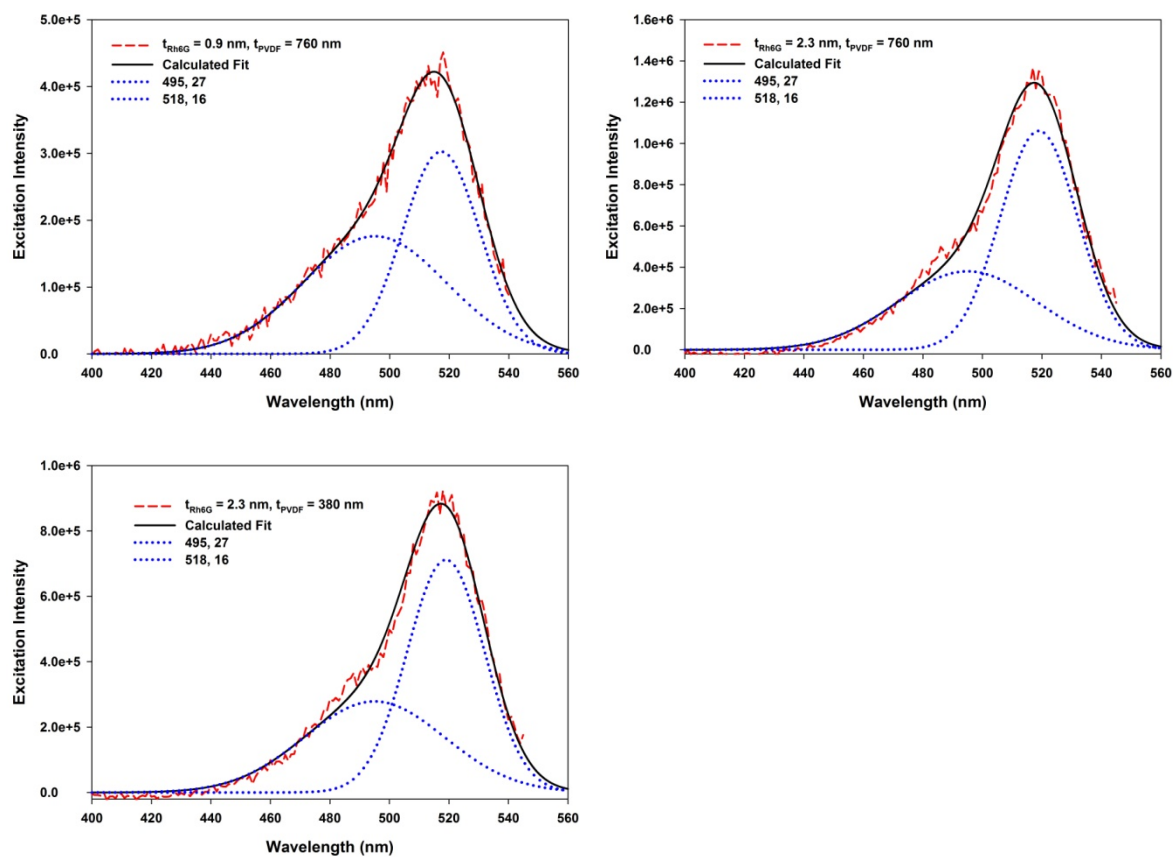

**Figure S3.** Fit lines constructed from the deconvolution of the excitation spectra of various combination of  $t_{\text{PVDF}}$  and  $t_{\text{Rh6G}}$ . Legend shows peak position and full-width-at-half-maximum in nm.

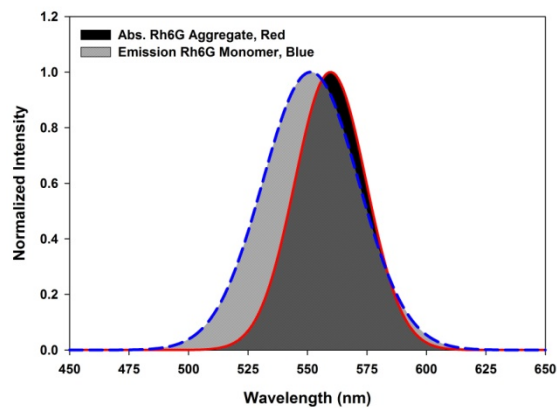

**Figure S4.** Spectral overlap of the deconvoluted peaks from the emission of monomeric Rh6G (light gray area, dashed blue line) with the absorbance of aggregated Rh6G (black area, solid red line).
